# Supplementary material
Source: Springer Nature journal article supplement (https://www.springermedizin.de/resource/supplementary/12885_2010_2720_MOESM3_ESM.pdf/9461842)

(A)

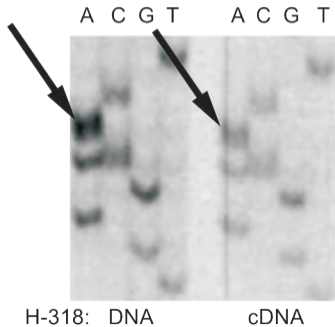

(B) 1.

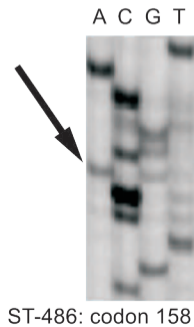

2.

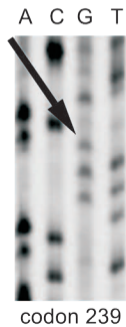

(C)

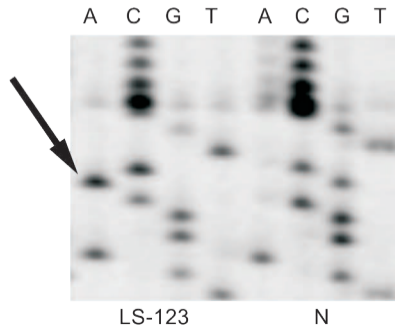

Supplement: MOESM3 [file 9461842]
